# Supplementary material for: Factors Affecting Disabled Consumer Preferences for an Electric Vehicle for Rural Mobility: An Italian Experimental Study
Source: MDPI journal article supplement (doi:10.3390/su15065570), 2023-03-22
Supplement: s1 [file s1]

# Factors Affecting Disabled Consumer Preferences for an Electric Vehicle for Rural Mobility: An Italian Experimental Study

## The Questionnaire

The questionnaire is composed by four main sections, which are: (i) consumers attitudes relating both to environmental issues and to environmentally friendly cars, as well as vehicle attribute which people pay attention to when they buy a car (Tables S1–S3); (ii) people’s driving habits (Table S4); (iii) consumers’ perceptions towards electric vehicles (Table S5–S7); and (iv) socio-demographic information of respondents (Table S8).

**Table S1.** Disabled people’s sensitivity to the environment.

| How much do you approve of the following expressions? |                                                                                                                                |
|-------------------------------------------------------|--------------------------------------------------------------------------------------------------------------------------------|
| 1.                                                    | Environmental pollution is an issue that I consider to be of major importance.<br>(1: totally disagree, to 10: totally agree). |
| 2.                                                    | I would like to minimize the ecological repercussions of my vehicle<br>(1: totally disagree, to 10: totally agree).            |
| 3.                                                    | I carry out waste sorting on a regular basis (1: totally disagree, to 10: totally agree).                                      |
| 4.                                                    | I consider buying home appliances according to their energy class (1: totally disagree, to 10: totally agree).                 |

Source: adapted by Jung et al. [1].

**Table S2.** Elements of the vehicle that people with disabilities consider important.

| How important are the following elements in choosing a car? |                            |                       |
|-------------------------------------------------------------|----------------------------|-----------------------|
| Comfort                                                     | Safety                     | Pleasure to drive     |
| Total mileage                                               | Design                     | Operation range       |
| Eco-friendliness                                            | Price                      | Brand name            |
| Acceleration                                                | Resale value (as used car) | Reliability           |
| Spaciousness                                                | Fueling/Charging time      | Gas/ Charging station |
|                                                             |                            | Accessibility         |
| Electric Vehicle (EV) penetration                           |                            |                       |

Source: adapted by Jung et al. [1]

**Table S3.** Consideration of environmentally friendly cars by people with disabilities.

| How much do you accept the following opinions ?                                                           |
|-----------------------------------------------------------------------------------------------------------|
| 1. I consider that the purchase of a sustainable car is ... (1. very bad to 10. very good)                |
| 2. I consider that the purchase of a sustainable car is ... (1. very foolish to 10. very wise)            |
| 3. I consider that the purchase of a sustainable car is... (1. very dissatisfying to 10. very satisfying) |

Source: adapted by Semeijn et al. [2]

**Table S4.** Respondent behavior questions.

| Variable                      | Description                                             |
|-------------------------------|---------------------------------------------------------|
| Drive frequency               | Never                                                   |
|                               | Less than once a month                                  |
|                               | 1 to 3 times a month                                    |
|                               | Less than once a week                                   |
|                               | 1 to 4 times a week                                     |
| Main reason for using the car | Daily                                                   |
|                               | For making the commute                                  |
|                               | For leisure activities, etc.                            |
| Type of engine in owned cars  | Car not environmentally sustainable (petrol, diesel)    |
|                               | Environmentally sustainable car (hybrid, electric, etc) |
| Number of possessed cars      | 1                                                       |
|                               | $\geq 2$                                                |

Source: adapted by Jung et al. [1]

**Table S5.** functional and hedonistic needs of the consumer.

| How much do you accept the following opinions? |                                                                                                                               |
|------------------------------------------------|-------------------------------------------------------------------------------------------------------------------------------|
| Functional needs                               |                                                                                                                               |
| 1.                                             | Environmentally sustainable cars cannot be adapted to my physical problems (1: totally disagree, to 10: totally agree).       |
| 2.                                             | Environmentally sustainable cars are unhandy for refilling/recharging operations (1: totally disagree, to 10: totally agree). |
| Hedonistic needs                               |                                                                                                                               |
| 1.                                             | Environmentally sustainable cars are interesting technological innovations (1: totally disagree, to 10: totally agree).       |
| 2.                                             | Environmentally sustainable cars confer high driving pleasure (1: totally disagree, to 10: totally agree).                    |

Source: adapted by Semeijn et al. [2]

**Table S6.** Propensity of the surveyed sample to drive, buy, and pay for an electric vehicle

| Questions                                                                                                                                                                                                                                                                                  |
|--------------------------------------------------------------------------------------------------------------------------------------------------------------------------------------------------------------------------------------------------------------------------------------------|
| 1. Did you ever use an electric-powered car? (0=No; 1=Yes)                                                                                                                                                                                                                                 |
| 2. Would you accept driving an electric-powered vehicle adapted for people with physical disabilities? (0=No; 1=Yes)                                                                                                                                                                       |
| 3. Would you accept buying an electric-powered vehicle adapted for people with physical disabilities? (0=No; 1=Yes)                                                                                                                                                                        |
| 4. What would be your willingness to pay for an electric-powered vehicle designed by CREA researchers? (low-level – less than 20,000 euro, moderate-level – range between 20,000 – 25,000 euro, high-level – range between 25,000 – 30,000 euro; very high level – more than 30,000 euro). |

**Table S7.** Consumer's propensity to purchase

| <b>How much do you agree with the following statements?</b> |                                                                                                                          |
|-------------------------------------------------------------|--------------------------------------------------------------------------------------------------------------------------|
| 1.                                                          | In the event of purchasing a new car, I am not opposed to buying an eco-car (1: totally disagree, to 10: totally agree). |
| 2.                                                          | In the event of purchasing a new car, I am planning to buy an eco-car (1: totally disagree, to 10: totally agree).       |
| 3.                                                          | In the event of purchasing a new car, I am going to buy an eco-car (1: totally disagree, to 10: totally agree).          |

Source: adapted by Semeijn et al. [2]

**Table S8.** Socio-demographic information about respondents.

| <b>Variable</b>              | <b>Description</b>                               |
|------------------------------|--------------------------------------------------|
| Sex                          | Male                                             |
|                              | Female                                           |
| Age                          | 18-34                                            |
|                              | 35-49                                            |
|                              | over 50                                          |
| Education                    | Low level (i.e. primary and/or secondary school) |
|                              | High level (i.e. degree, Ph.D and/or masters)    |
| Residence location           | Village (less than 5000 inhabitants)             |
|                              | Small town (5000–30,000 inhabitants)             |
|                              | City (more than 30,000 inhabitants)              |
| Monthly family income (euro) | <1,800                                           |
|                              | 1,801-2,500                                      |
|                              | 2,501-3,200                                      |
|                              | 3,201-3,900                                      |
|                              | 3,901-4,600                                      |

## The Factor Analysis

**Table S9.** The factor analysis with varimax rotation

| Items group                                                                                           | Environment | Vehicle attributes | Friendly car | Functional motivation | Hedonic motivation | Purchase intention |
|-------------------------------------------------------------------------------------------------------|-------------|--------------------|--------------|-----------------------|--------------------|--------------------|
| How much do you approve of the following expressions? ( $\alpha = 0.93$ )                             |             |                    |              |                       |                    |                    |
| Environmental pollution is an issue that I consider to be of major importance.                        | 0.83        |                    |              |                       |                    |                    |
| I would like to minimize the ecological repercussions of my vehicle                                   | 0.93        |                    |              |                       |                    |                    |
| I carry out waste sorting on a regular basis                                                          | 0.82        |                    |              |                       |                    |                    |
| I consider buying home appliances according to their energy class                                     | 0.89        |                    |              |                       |                    |                    |
| <b>How important are the following elements in choosing a car? (<math>\alpha = 0.91</math>)</b>       |             |                    |              |                       |                    |                    |
| Comfort                                                                                               |             | 0.77               |              |                       |                    |                    |
| Safety                                                                                                |             | 0.73               |              |                       |                    |                    |
| Pleasure to drive                                                                                     |             | 0.80               |              |                       |                    |                    |
| Total mileage                                                                                         |             | 0.95               |              |                       |                    |                    |
| Design                                                                                                |             | 0.91               |              |                       |                    |                    |
| Operation range                                                                                       |             | 0.89               |              |                       |                    |                    |
| Eco-friendliness                                                                                      |             | 0.90               |              |                       |                    |                    |
| Price                                                                                                 |             | 0.80               |              |                       |                    |                    |
| Brand name                                                                                            |             | 0.82               |              |                       |                    |                    |
| Acceleration                                                                                          |             | 0.87               |              |                       |                    |                    |
| Resale value (as used car)                                                                            |             | 0.91               |              |                       |                    |                    |
| Reliability                                                                                           |             | 0.87               |              |                       |                    |                    |
| Spaciousness                                                                                          |             | 0.88               |              |                       |                    |                    |
| Fueling/Charging time                                                                                 |             | 0.79               |              |                       |                    |                    |
| Gas/ Charging station accessibility                                                                   |             | 0.76               |              |                       |                    |                    |
| <b>How much do you accept the following opinions? (<math>\alpha = 0.98</math>)</b>                    |             |                    |              |                       |                    |                    |
| I consider that the purchase of a sustainable car..<br>.. (1. very bad to 10. very good)              |             |                    | 0.72         |                       |                    |                    |
| I consider that the purchase of a sustainable car<br>...(1. very foolish to 10. very wise)            |             |                    | 0.91         |                       |                    |                    |
| I consider that the purchase of a sustainable car..<br>(1. very dissatisfying to 10. very satisfying) |             |                    | 0.77         |                       |                    |                    |
| <b>How much do you accept the following opinions ? (<math>\alpha = 0.97</math>)</b>                   |             |                    |              |                       |                    |                    |
| Environmentally sustainable cars cannot be adapted to my physical problems.                           |             |                    |              | 0.80                  |                    |                    |
| Environmentally sustainable cars are unhandy for refilling/recharging operations                      |             |                    |              | 0.88                  |                    |                    |
| <b>How much do you approve of the following expressions? (<math>\alpha = 0.98</math>)</b>             |             |                    |              |                       |                    |                    |
| Environmentally sustainable cars are interesting technological innovations                            |             |                    |              |                       | 0.89               |                    |
| Environmentally sustainable cars confer high driving pleasure.                                        |             |                    |              |                       | 0.97               |                    |
| <b>How much do you approve of the following expressions? (<math>\alpha = 0.90</math>)</b>             |             |                    |              |                       |                    |                    |
| In the event of purchasing a new car, I am not opposed to buying an eco-car.                          |             |                    |              |                       |                    | 0.93               |
| In the event of purchasing a new car, I am planning to buy an eco-car                                 |             |                    |              |                       |                    | 0.97               |
| In the event of purchasing a new car, I am going to buy an eco-car                                    |             |                    |              |                       |                    | 0.88               |

Source: Our elaboration on survey data.

## References

1. Jung, J.; Yeo, S.; Lee, Y.; Moon, S.; Lee, D.J. Factors affecting consumers' preferences for electric vehicle: A Korean case. *Res. Transp. Bus. Manag.* **2021**, *41*, 100666.
2. Semeijn, J.; Gelderman, C.J.; Schijns, J.M.C.; van Tiel, R. Disability and pro environmental behavior – An investigation of the determinants of purchasing environmentally friendly cars by disabled consumers. *Transp. Res. Part D Transp. Environ.* **2019**, *67*, 197–207.
