# Supplementary material for: Factors Affecting Disabled Consumer Preferences for an Electric Vehicle for Rural Mobility: An Italian Experimental Study
Source: MDPI journal article supplement (doi:10.3390/su15065570), 2023-03-22
Supplement: s1 [file s1]

Archive with 1 entries (1 files):
- sustainability-2241361-supplementary.pdf
